# Supplementary material for: A microchip fabricated with a vapor-diffusion self-assembled-monolayer method to transport droplets across superhydrophobic to hydrophilic surfaces
Source: Royal Society of Chemistry journal article supplement (doi:10.1039/b917624a), 2009-12-01

## Supplementary Data

We had also tested the elliptical-cap model in another gradient surface. The result shows that the net force predicted by the model is in reasonable agreement with experimental data.

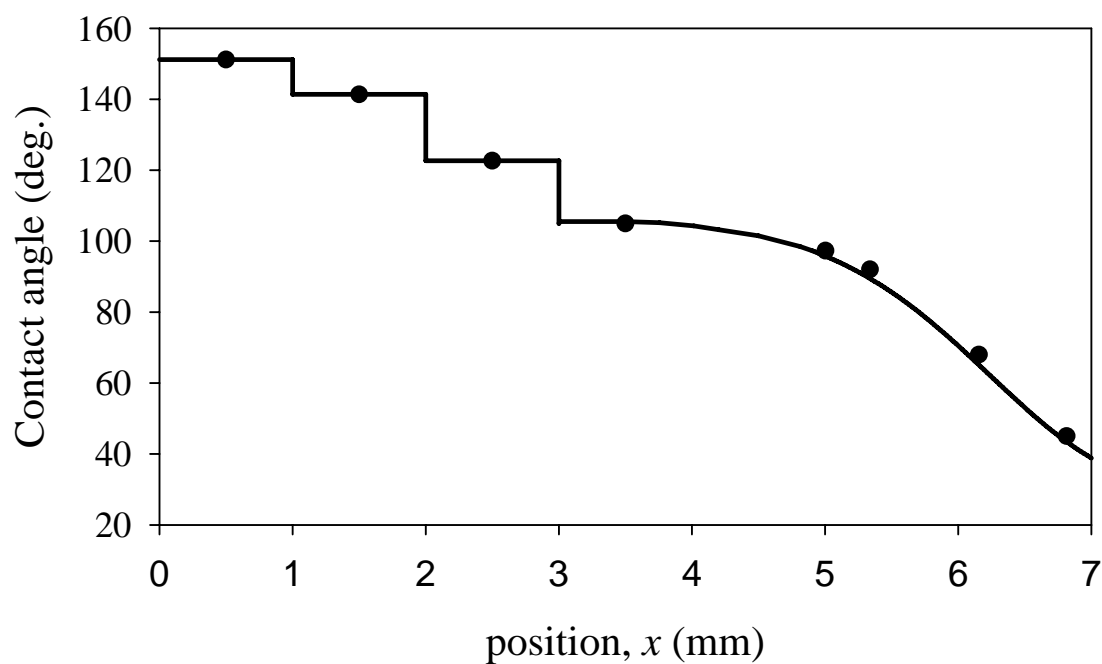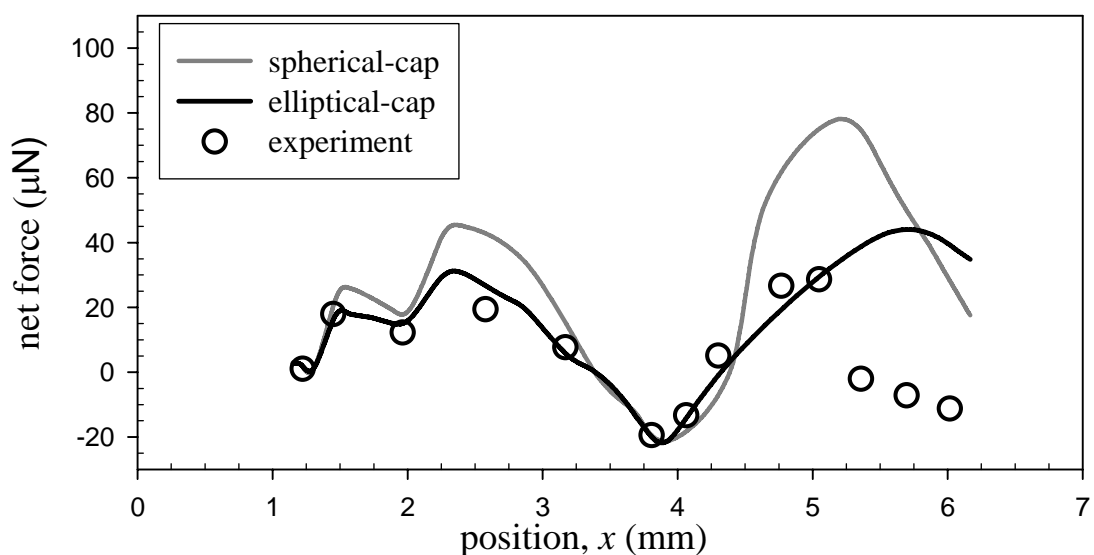

Supplement: b917624a.pdf [file b917624a.pdf]
